# Supplementary material for: Activated Carbon from the Peelings of Cassava Tubers (Manihot esculenta) for the Removal of Nickel(II) Ions from Aqueous Solution
Source: Hindawi journal article supplement (doi:10.1155/2021/5545110), 2021-07-31
Supplement: f1 [file 5545110.f1.docx]

**Journal of Chemistry**

**Suplementary Material for**

**Activated Carbon from the Peelings of Cassava Tubers (*Manihot Esculenta*) for the Removal of Nickel(II) from Aqueous Solution**

**Brice Armel Ajouafeu Alongamo1,Lydie Dodo Ajifack2, Julius Numbonui Ghogomu1,2*, Ndi Julius Nsami3and Joseph Mbadcam Ketcha3**

1Department of Chemistry, Faculty of Science, University of Dschang, P.O. Box 67, Dschang, Cameroon

2Department of Chemistry, Faculty of Science, The University of Bamenda, P.O. Box 39 Bambili, Cameroon

3Department of Inorganic Chemistry, Faculty of Science University of Yaounde, 1 P.O. Box 812, Yaounde, Cameroon

***Corresponding author:** Julius Numbonui Ghogomu; [ghogsjuju@hotmail.com](mailto:ghogsjuju@hotmail.com)

**ORCID**: 0000-0002-2445-706X

Table S1: Variations of impregnation ratios, times, rate of heating and the temperatures of carbonization

| Raw Materials | activating agent | Temperatures of carbonization | Times and temperatures of impregnated | Impregnation ratios | Rate of heating | Times of carbonization |
| --- | --- | --- | --- | --- | --- | --- |
| Peelings of Cassava Tubers(*Manihot esculenta*) | H3PO4  (10 %) | 300 °C | 24 hours at 110 °C | 1 : 1 | 10 °C/ min | 1 heure |
| 1: 2 |
| 2 : 1 |
| 400 °C | 24 hours at110 °C | 1 : 1 |
| 1 : 2 |
| 2 : 1 |
| 500 °C | 24 hours at 110 °C | 1 : 1 |
| 1 : 2 |
| 2 : 1 |
| KOH  (10 %) | 300 °C | 24 hours at 110 °C | 1 : 1 | 10 °C/min | 1 heure |
| 1 :2 |
| 2 : 1 |
| 400 °C | 24 hours at 110 °C | 1 : 1 |
| 1 : 2 |
| 2 : 1 |
| 500 °C | 24 hours at 110 °C | 1 : 1 |
| 1 : 2 |
| 2 : 1 |

**Adsorption isotherms**

FIGURE S1: Langmuir isotherm for the adsorption of nickel(II) ions onto activated carbon prepared (ACPH, ACPA and NIC) and **raw material (RM)**

**3.9**

**3.7**

**3.5**

**3.3**

**3.1**

**2.9**

**2.7**

**-1 0 1 2 3 4**

FIGURE S2: Freundlich isotherm for the adsorption of nickel(II) ions onto activated carbon prepared (ACPH, ACPA and NIC) and **raw material (RM)**

**43**

**38**

**33**

**28**

**23**

**18**

**1**3

**-1 0 1 2 3 4 5**

FIGURE S3: Temkin isotherm for the adsorption of nickel(II) ions onto activated carbon prepared (ACPH, ACPA and NIC) and **raw material (RM)**

**kinetics of Adsorption process**

**3**

**2.5**

**2**

**1.5**

**1**

**0.5**

**0**

FIGURE S4: first-order model for the adsorption of nickel(II) ions onto activated carbon prepared (ACPH, ACPA and NIC) and **raw material (RM)**

**1.6**

**1.4**

**1.2**

**1**

**0.8**

**0.6**

**0.4**

**0.2**

**0**

FIGURE S5: second-order model for the adsorption of nickel(II) ions onto activated carbon prepared (ACPH, ACPA and NIC) and **raw material (RM)**

FIGURE S6: Elovich model for the adsorption of nickel(II) ions onto activated carbon prepared (ACPH, ACPA and NIC) and **raw material (RM)**
